# Supplementary material for: Comparison of Muscle Regeneration after BMSC-Conditioned Medium, Syngeneic, or Allogeneic BMSC Injection
Source: MDPI journal article supplement (doi:10.3390/cells11182843), 2022-09-12
Supplement: s1 [file s1]

Supplementary Materials:

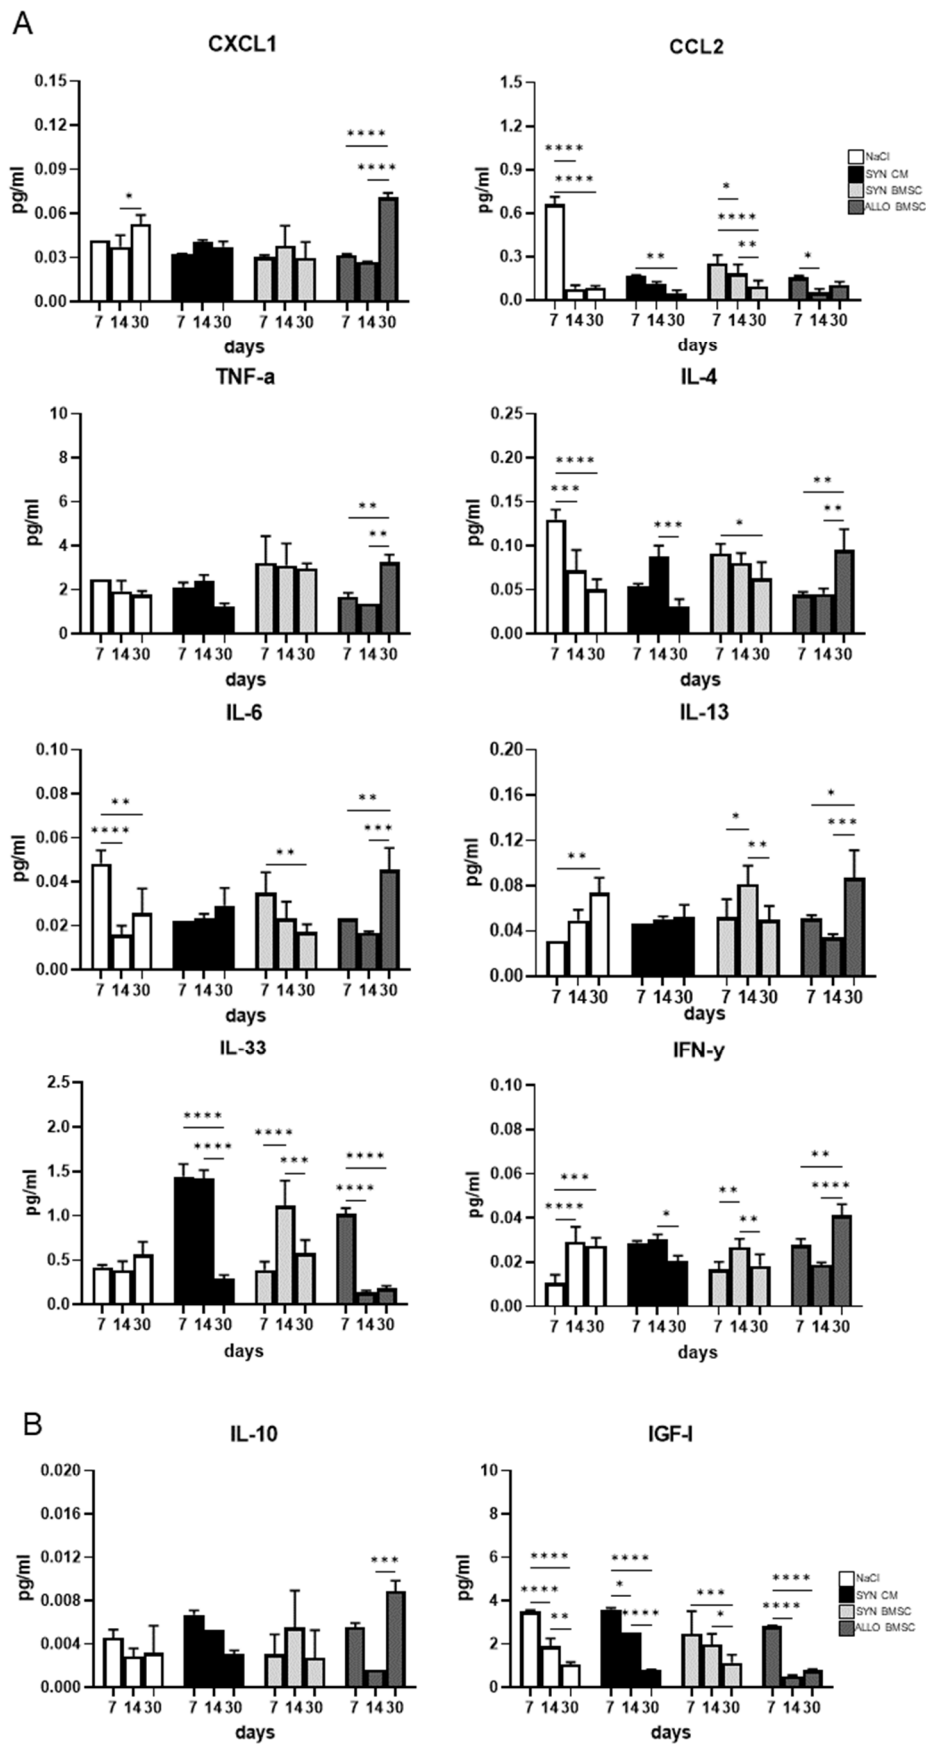

**Supplementary Figure S1.** Concentration of selected pro-inflammatory factors in muscles injected with either NaCl, SYN CM, SYN BMSCs or ALLO BMSCs. (A) Concentration of pro-inflammatory factors: CXCL1, CCL2, TNF- $\alpha$ , IL-4, IL-6, IL-13, IL-33, and IFN- $\gamma$  in muscles injected with NaCl (control, white bars) or SYN CM (black bars) or SYN BMSCs (light grey bars) or ALLO BMSCs (dark grey bars) on day 7, 14 and 30 after injury. (B) Concentration of anti-inflammatory factors: IL-10 and IGF-I in muscles injected with NaCl (control, white bars) or SYN CM (black bars) or SYN BMSCs (light grey bars) or ALLO BMSCs (dark grey bars) on day 7, 14 and 30 after injury. Data are presented as means of three independent experiments with standard deviations. Data found to be statistically significant are underlined on graphs and are marked with asterisks (\*  $p < 0.05$ ; \*\*  $p < 0.01$ ; \*\*\*  $p < 0.001$ ; \*\*\*\*  $p < 0.0001$ ).

**Supplementary Table S1.** Probes used in qPCR analysis.

| Gene name    | Probe number  | Marker         |
|--------------|---------------|----------------|
| <i>Ccr7</i>  | Mm01301785    | T lymphocytes  |
| <i>Cd68</i>  | Mm03047340    | M1 macrophages |
| <i>Cd163</i> | Mm00474091    | M1 macrophages |
| <i>Ly6c2</i> | Mm00841873    | M1 macrophages |
| <i>Hprt</i>  | Mm00446968_m1 | M1 macrophages |
